# Supplementary material
Source: publisher figshare collection journal article supplement (https://gsapubs.figshare.com/articles/dataset/_/19358453)
Supplement: Supplementary file 1 [file 1]

Shao-Rui Zhao, Jian-Wei Li, Christopher R.M. McFarlane, Paul T. Robinson, Zhan-Ke Li, Ya-Fei Wu, Xin-Fu Zhao, Chong-Guo He, Xu Kang, and Chang-Yan Chen, 2022, Recognition of late Paleoproterozoic gold mineralization in the North China craton: Evidence from multimineral U-Pb geochronology and stable isotopes of the Shangong deposit: GSA Bulletin, <https://doi.org/10.1130/B36281.1>.

## Supplemental Material

**TABLE S1.** LA-ICP-MS TRACE ELEMENT COMPOSITIONS OF PYRITE (PPM) FROM THE FOUR ORE SEGMENTS OF THE SHANGGONG GOLD DEPOSIT.

**TABLE S2.** RESULTS OF LA-ICP-MS U-PB ISOTOPE ANALYSIS OF HYDROTHERMAL MONAZITE, APATITE, AND RUTILE FROM THE SHANGGONG GOLD DEPOSIT

**TABLE S3.** LA-MC-ICP-MS SULFUR ISOTOPES OF SULFIDES FROM THE SHANGGONG GOLD DEPOSIT

**TABLE S4.** LA-MC-ICP-MS LEAD ISOTOPES OF STAGE II PYRITE FROM THE SHANGGONG GOLD DEPOSIT
